# Supplementary material for: A pilot study on clinical efficacy of Agnikarma and Pathyadi decoction (an Ayurvedic formulation) in the management of Ardhavabhedaka (migraine)
Source: PubMed Central journal article supplement — Ayu. 2018 Jan-Mar;39(1):56–61. doi: 10.4103/ayu.AYU_84_17 (PMC6287398; doi:10.4103/ayu.ayu_84_17), 2018
Supplement: AYU-39-56_Suppl1.pdf [file AYU-39-56_Suppl1.pdf]

NAME:

B.T. / A.T.:

O.D.D/I.P.D.

DATE:

**HIT-6™ Headache Impact Test**

(To complete, please circle one answer for each question.)

1. When you have headaches, how often is the pain severe?

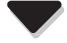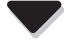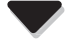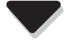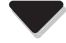

Never

rarely

sometimes

very often

always

2. How often do headaches limit your ability to do usual daily activities including household work, work, school, or social activities?

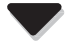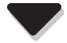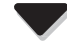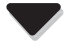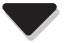

Never

rarely

sometimes

very often

always

3. When you have a headache, how often do you wish you could lie down?

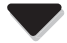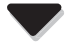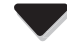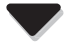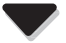

Never

rarely

sometimes

very often

always

4. In the past 4 weeks, how often have you felt too tired to do work or daily activities because of your headaches?

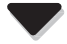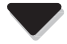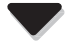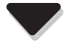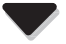

Never

rarely

sometimes

very often

always

5. In the past 4 weeks, how often have you felt fed up or irritated because of your headaches?

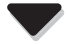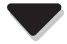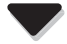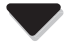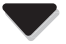

Never

rarely

sometimes

very often

always

6. In the past 4 weeks, how often did headaches limit your ability to concentrate on work or daily activities?

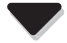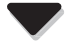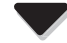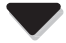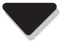

Never

rarely

sometimes

very often

always






COLUMN 1

COLUMN 2

COLUMN 3

COLUMN 4

COLUMN 5

6 points each

8 points each

10 Points each

11 Points each

13 Points each
